# Supplementary material
Source: PubMed Central journal article supplement (PMC3879704)
Supplement: cr2013156x1.pdf [file cr2013156x1.pdf]

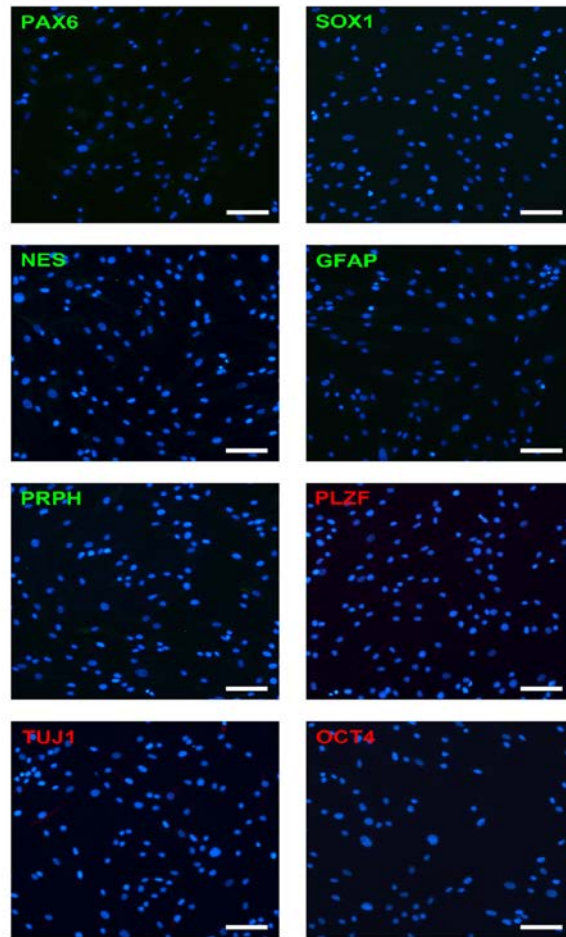

**Supplementary information, Figure S1** Characterization of starting foreskin fibroblasts. Markers of neural progenitors (PAX6, SOX1, NESTIN (NES), and PLZF), glial (GFAP), peripheral (PRPH), neuronal (TUJ1), and pluripotent (OCT4) cells were absent in CRL-2097 cells. Scale bars, 100  $\mu$ m.
