# Supplementary material
Source: PubMed Central journal article supplement (PMC3879704)
Supplement: cr2013156x2.pdf [file cr2013156x2.pdf]

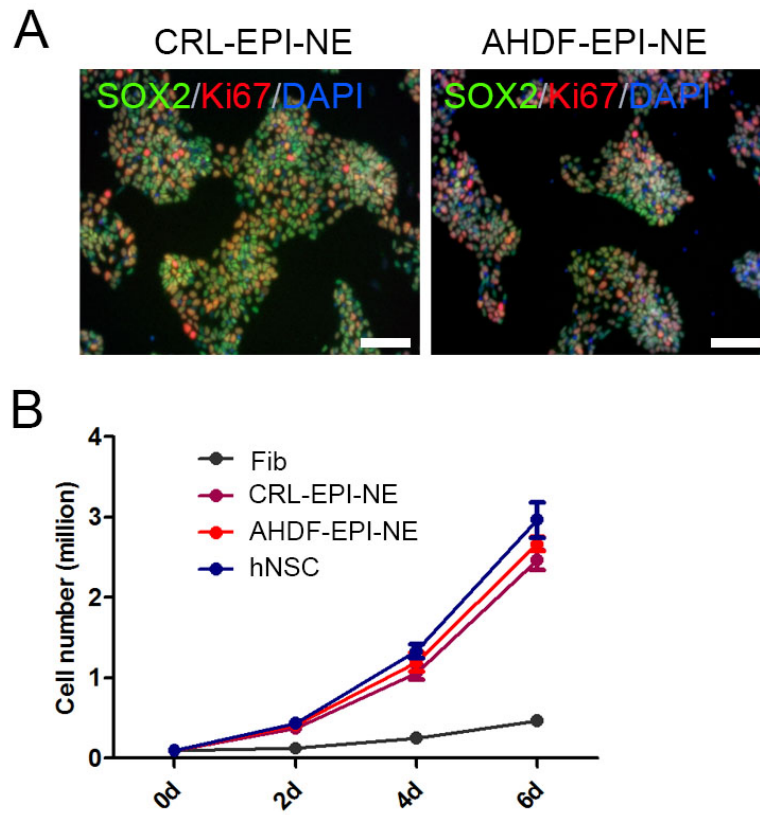

**Supplementary information, Figure S2** The proliferative property of hiNSCs. **(A)** The SOX2-expressing hiNSCs which are reprogrammed from neonatal fibroblasts CRL-2097 (CRL) and adult human dermal fibroblasts (AHDF) expressed proliferative marker Ki67. Scale bars, 100  $\mu$ m. **(B)** The growth curve of hiNSCs is comparable to hNSCs (n=3).
