# Supplementary material
Source: PubMed Central journal article supplement (PMC3879704)
Supplement: cr2013156x3.pdf [file cr2013156x3.pdf]

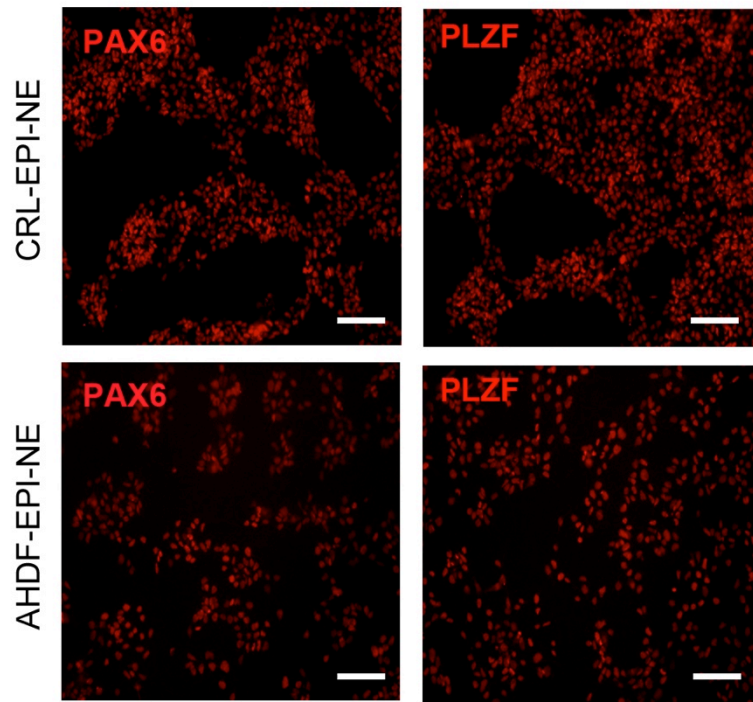

**Supplementary information, Figure S3** The NSC marker expression in the hiNSCs derived with the episomal method. CRL-EPI-NE is derived from neonatal fibroblasts and AHDF-EPI-NE is derived from adult human dermal fibroblasts. Scale bars, 100  $\mu$ m.
