# Supplementary material
Source: PubMed Central journal article supplement (PMC3879704)
Supplement: cr2013156x4.pdf [file cr2013156x4.pdf]

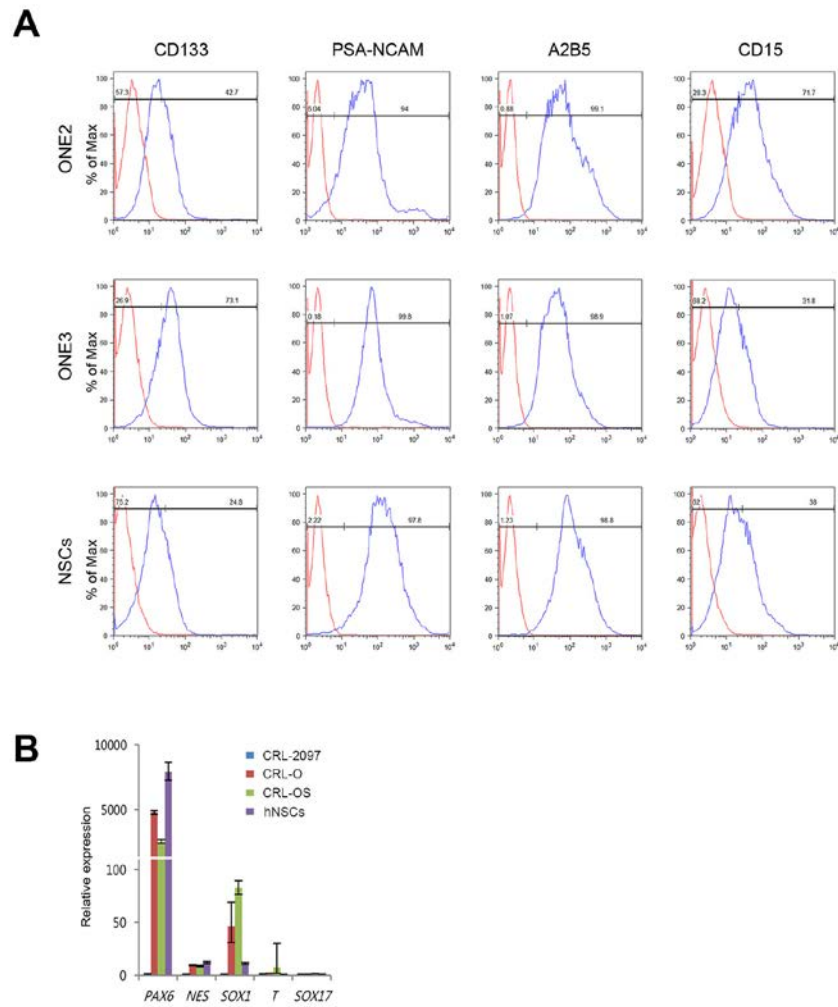

**Supplementary information, Figure S4 (A)** Directly reprogrammed cells express markers similar to hNSCs. Two directly reprogrammed hiNSC lines (ONE2 and ONE3, both expanded for more than 5 passages) were analyzed and compared to human embryonic stem cell-derived NSCs using flow cytometry. Expression of the neural precursor markers CD133, CD15, and PSA-NCAM, and the glial progenitor marker A2B5 were all quite similar to human NSCs. **(B)** Quantitative marker gene expression in directly reprogrammed hiNSCs. *PAX6*, *NESTIN (NES)* and *SOX1* are neural ectodermal markers. *T* and *SOX17* are markers of mesoderm and endoderm, respectively. All expression levels are relative to CRL-2097 cells.
