# Supplementary material
Source: PubMed Central journal article supplement (PMC3879704)
Supplement: cr2013156x5.pdf [file cr2013156x5.pdf]

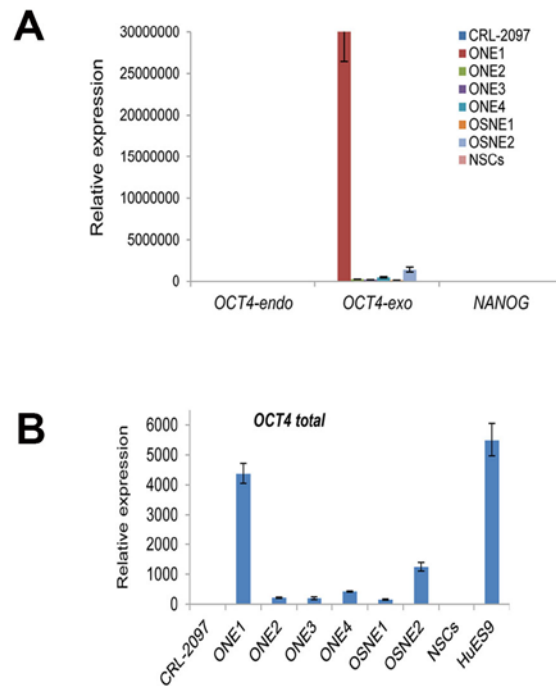

**Supplementary information, Figure S5 (A)** Low expression of residual exogenous *OCT4* in directly reprogrammed hiNSCs. Relative expression of endogenous *OCT4* (*OCT4-endo*), exogenous *OCT4* (*OCT4-exo*) and *NANOG* were analysed by quantitative PCR in the starting CRL-2097 cells, in four cell lines reprogrammed by *OCT4* alone (ONE1, 2, 3, and 4), in two cell lines reprogrammed by *OCT4* and *SOX2* (OSNE1 and 2), and in NSCs derived from HuES9. **(B)** Total *OCT4* expression, including both endogenous and exogenous *OCT4*, was analyzed. Compared to HuES9, the total amount of *OCT4* expressed was very low except in the partially reprogrammed cell line, ONE1. All expression levels are relative to CRL-2097 cells.
