# Supplementary material
Source: PubMed Central journal article supplement (PMC3879704)
Supplement: cr2013156x6.pdf [file cr2013156x6.pdf]

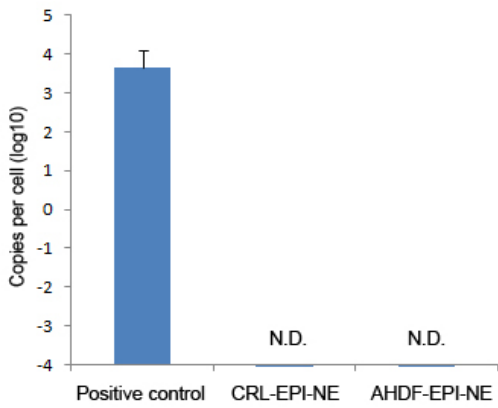

**Supplementary information, Figure S6** Copy numbers of episomal vectors in each hiNSCs derived through episomal method. The result indicated the absence of integration of the episomal vector in these established hiNSCs (> passage 20) (n=3). N.D, not detected.
