# Supplementary material
Source: PubMed Central journal article supplement (PMC3879704)
Supplement: cr2013156x7.pdf [file cr2013156x7.pdf]

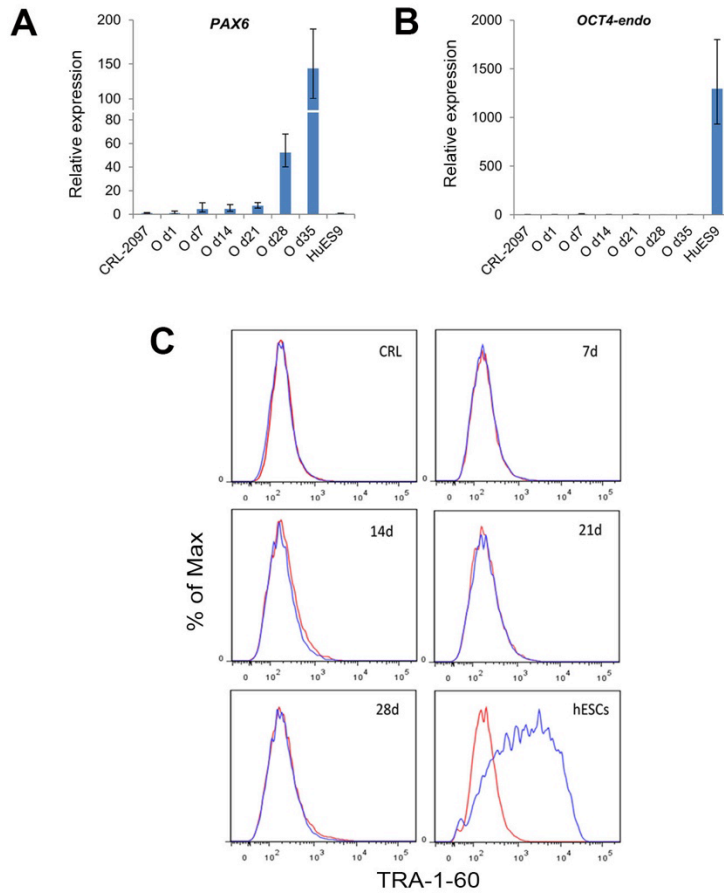

**Supplementary information, Figure S7** Quantitative expression of marker genes during direct reprogramming using OCT4 alone. Cells undergoing reprogramming were analyzed each week for *PAX6* (A) and endogenous *OCT4* (*OCT4-endo*)(B). All expression levels are relative to CRL-2097. (C) Analysis of TRA-1-60 expression during direct reprogramming in CRL-2097 (CRL) using flow cytometry. Human embryonic stem cells (HuES9) are used as positive control.
