# Supplementary material
Source: PubMed Central journal article supplement (PMC3879704)
Supplement: cr2013156x8.pdf [file cr2013156x8.pdf]

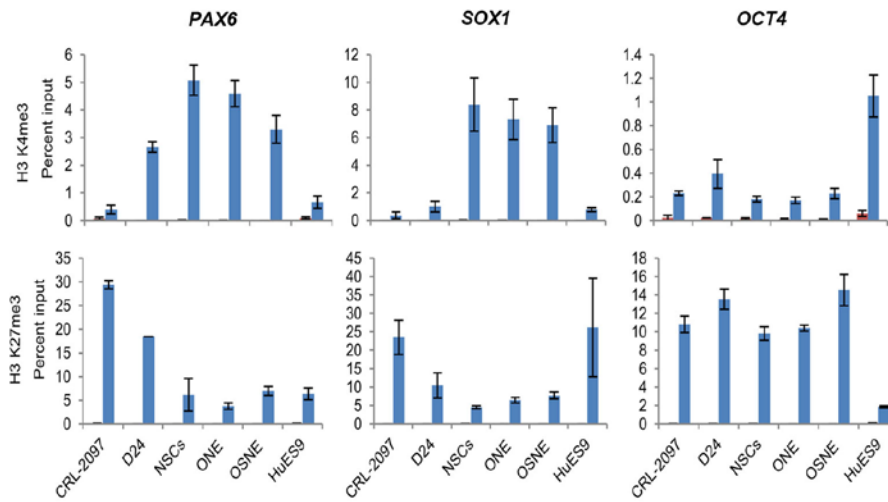

**Supplementary information, Figure S8** Histone modification during direct reprogramming. *PAX6*, *SOX1*, and *OCT4* promoter loci were analyzed by chromatin immunoprecipitation with anti-H3K4me3 and H3K27me3 antibodies. hNSCs derived from HuES9, reprogrammed hiNSCs (ONE and OSNE) and HuES9 were used as controls. Blue bars represent the extent of immunoprecipitation from anti-modified histone antibodies and red bars from normal IgG.
