# Supplementary material
Source: PubMed Central journal article supplement (PMC3879704)
Supplement: cr2013156x9.pdf [file cr2013156x9.pdf]

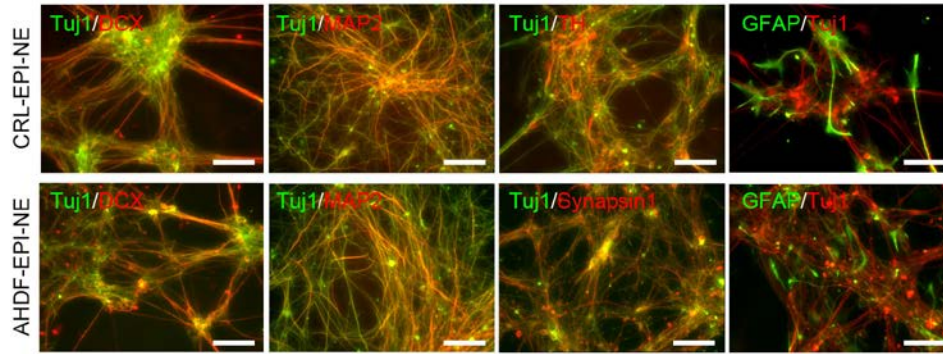

**Supplementary information, Figure S9** Immunostaining of cells differentiated from other hiNSC lines, CRL-EPI-NE and AHDF-EPI-NE. Scale bars, 100  $\mu$ m.
