# Supplementary material
Source: PubMed Central journal article supplement (PMC3879704)
Supplement: cr2013156x10.pdf [file cr2013156x10.pdf]

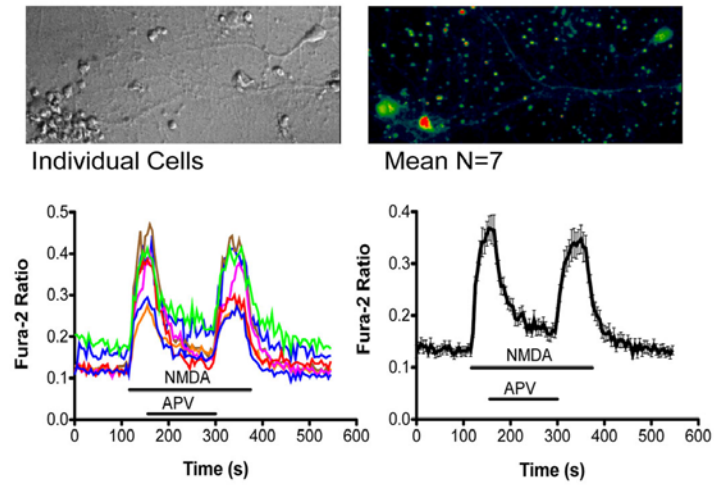

**Supplementary information, Figure S10** Representative traces showing 100  $\mu\text{M}$  NMDA-induced calcium responses detected with Fura-2 in 8-week-old neurons derived from hiNSCs. NMDA responses were completely blocked by the specific NMDA receptor antagonist 2-amino-5-phosphonovaleric acid (APV, 200  $\mu\text{M}$ ) in all 17 of the 29 cells analysed that responded to NMDA treatment.
