# Supplementary material
Source: PubMed Central journal article supplement (PMC3879704)
Supplement: cr2013156x11.pdf [file cr2013156x11.pdf]

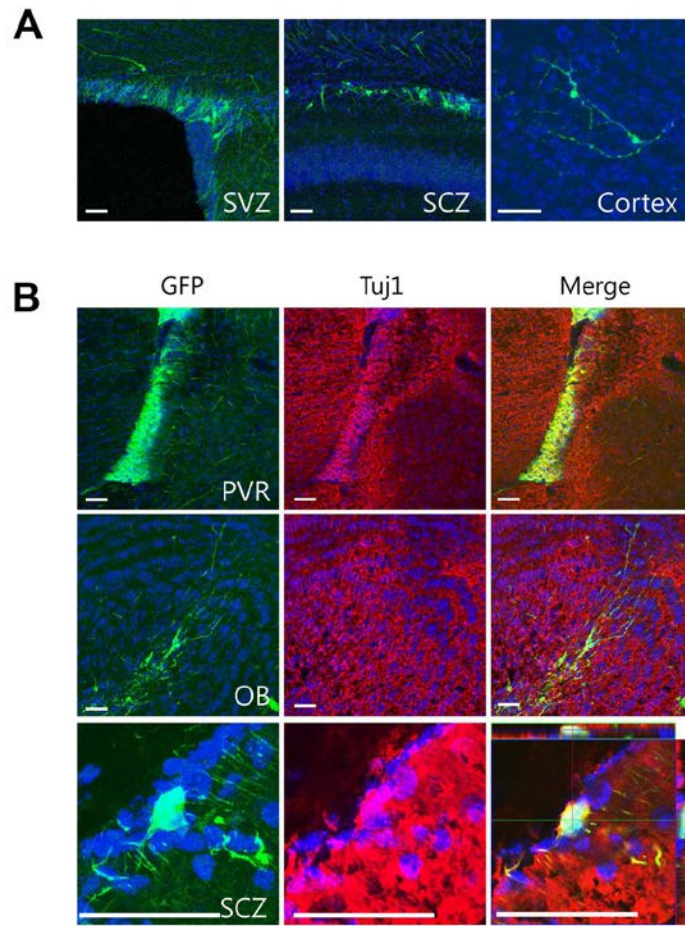

**Supplementary information, Figure S11 (A)** GFP-expressing cells migrated and integrated into various areas of the mouse brain, including the subventricular zone (SVZ), subcallosal zone (SCZ), and cerebral cortex, 2 weeks after transplantation. **(B)** GFP-expressing transplanted hiNSCs immunostained with neuronal marker Tuj1. Transplanted cells successfully migrated and integrated into the periventricular zone (PVZ) and olfactory bulb (OB), where endogenous neuroblasts derived from SVZ NSCs migrate. A few cells also migrated posteriorly into the subcallosal zone (SCZ). Scale bars, 50  $\mu$ m.
